# Supplementary material for: Helix breaking transition in the S4 of HCN channel is critical for hyperpolarization-dependent gating
Source: eLife journal article supplement (doi:10.7554/elife.53400), 2019-11-27
Supplement: supp [file elife-53400-supp-v1.zip]

Supplementary Table 1

| $\Delta G_r(\text{HCN1} \rightarrow \text{mut})$ [kcal/mol] | $\Delta G_a(\text{HCN1} \rightarrow \text{mut})$ [kcal/mol] |
|-------------------------------------------------------------|-------------------------------------------------------------|
| $-15.4 \pm 0.3$                                             | $-15.0 \pm 0.2$                                             |
| $-15.3 \pm 0.2$                                             | $-14.5 \pm 0.2$                                             |
| $-15.4 \pm 0.4$                                             | $-14.9 \pm 0.2$                                             |
| -                                                           | $-14.4 \pm 0.4$                                             |
| -                                                           | $-14.5 \pm 0.2$                                             |
