# Supplementary figures and images for: Helix breaking transition in the S4 of HCN channel is critical for hyperpolarization-dependent gating
Source: eLife journal article supplement (doi:10.7554/elife.53400), 2019-11-27

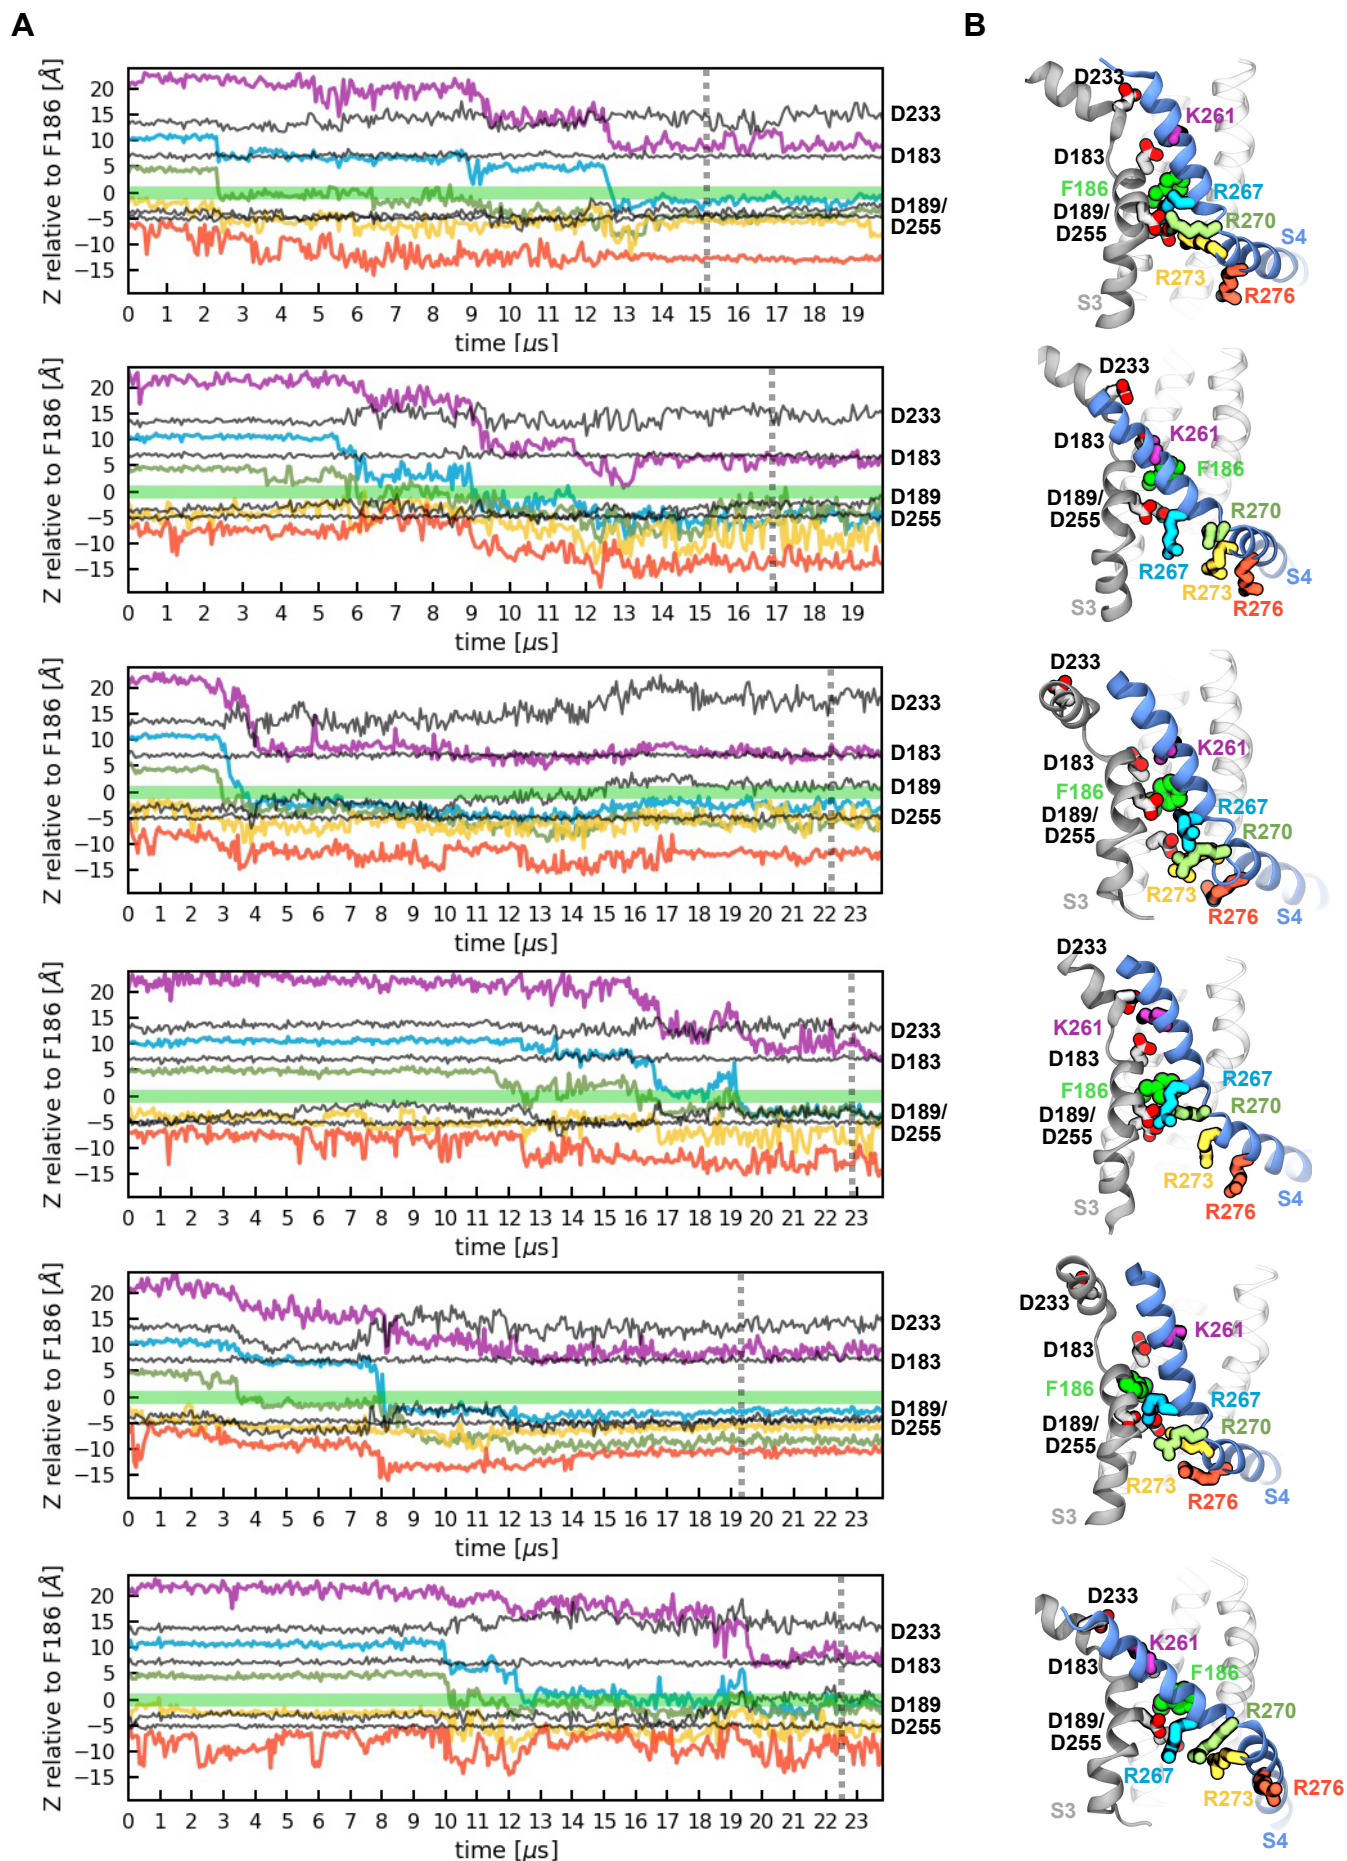

Figure 1 - Figure Supplement 2

Supplement: supp [file elife-53400-supp-v1.zip]

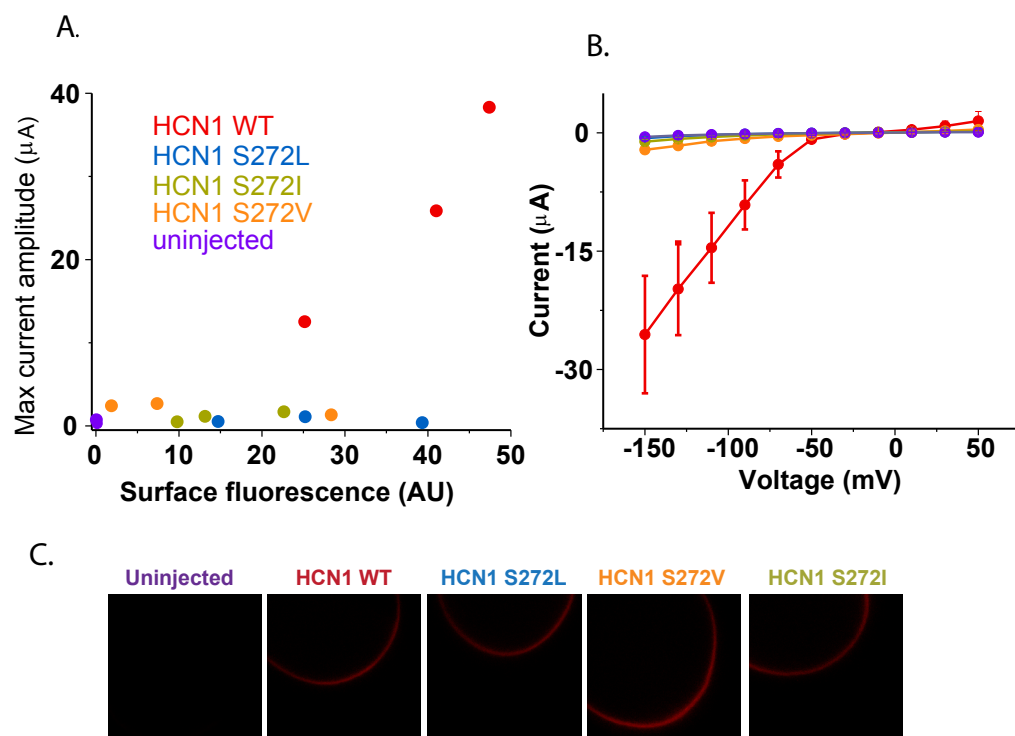

Figure 3 - Figure Supplement 2

Supplement: supp [file elife-53400-supp-v1.zip]

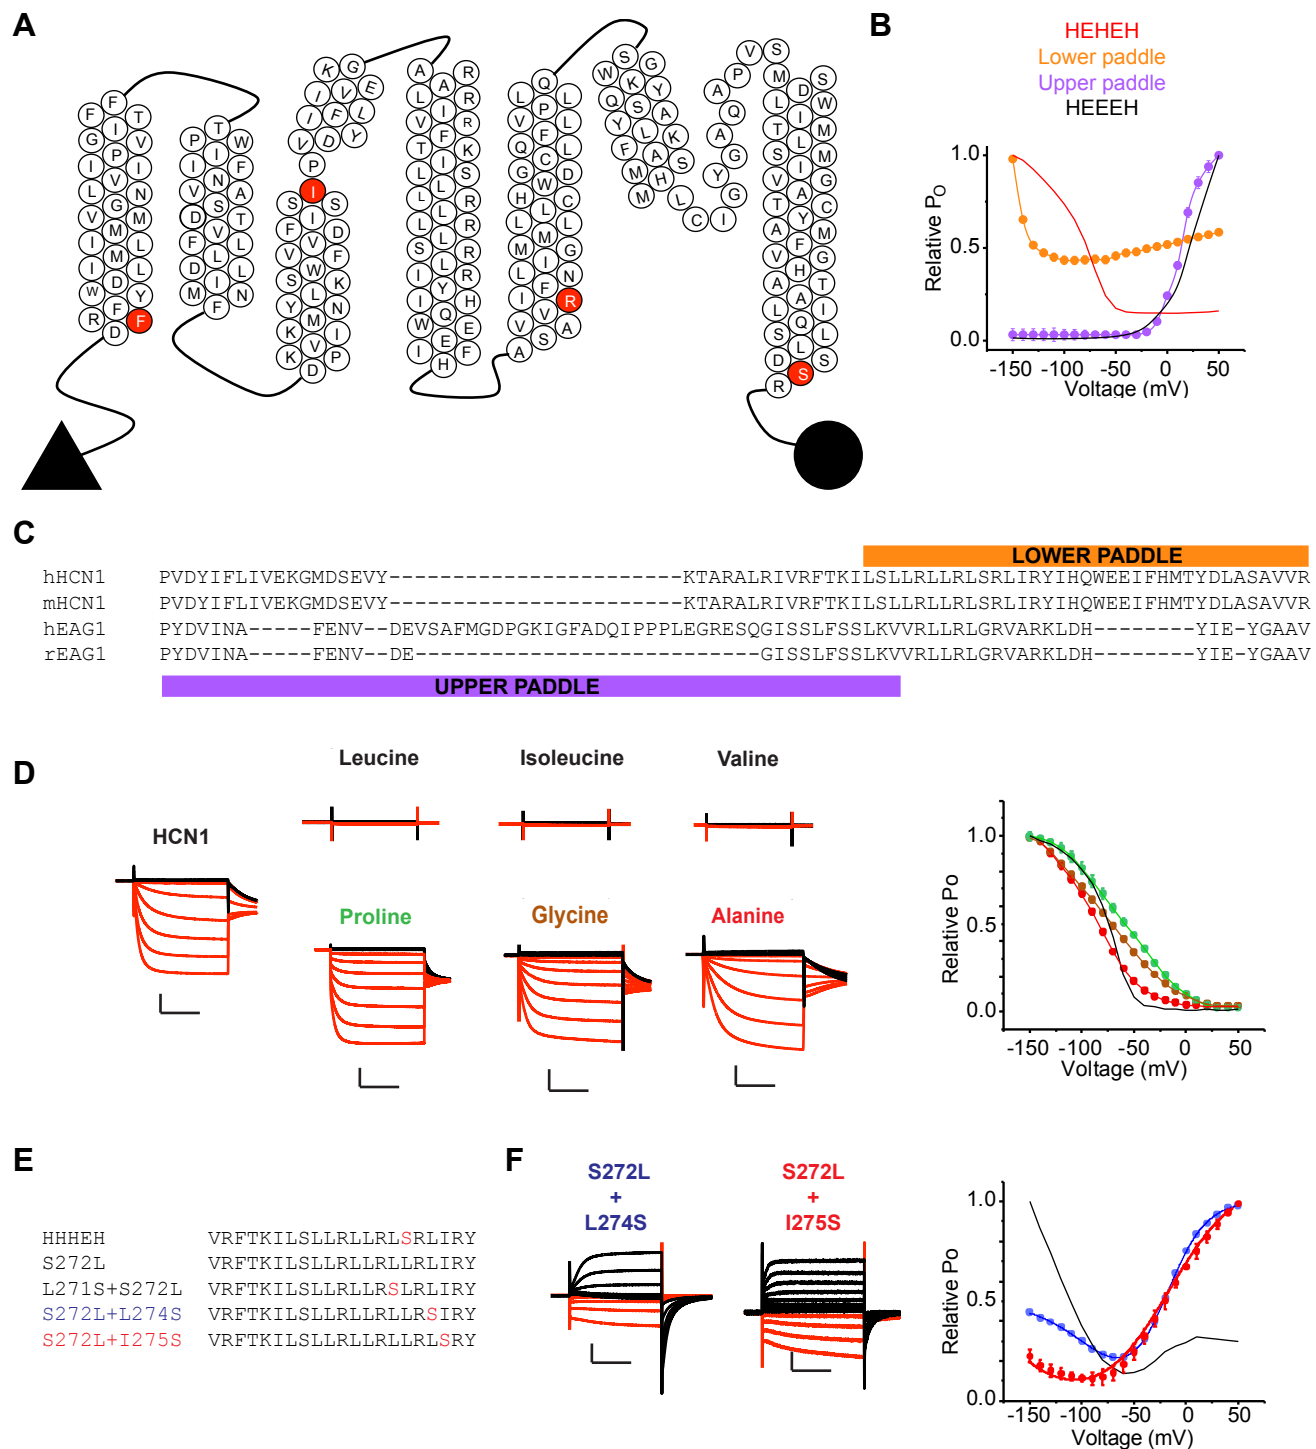

Figure 3 - Figure Supplement 1

Supplement: supp [file elife-53400-supp-v1.zip]

**A**

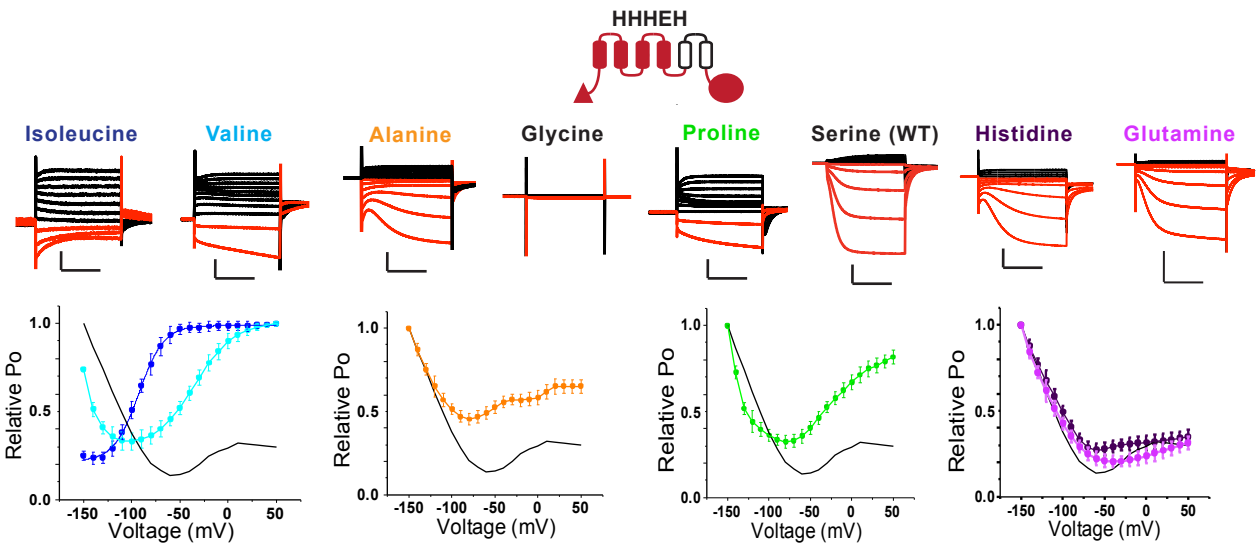

**B**

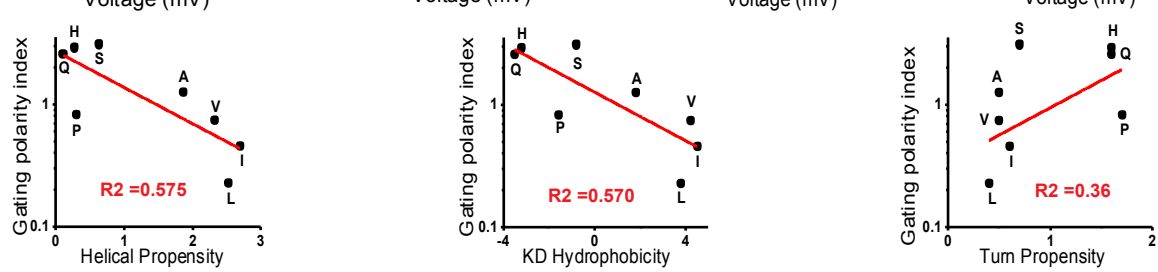

**C**

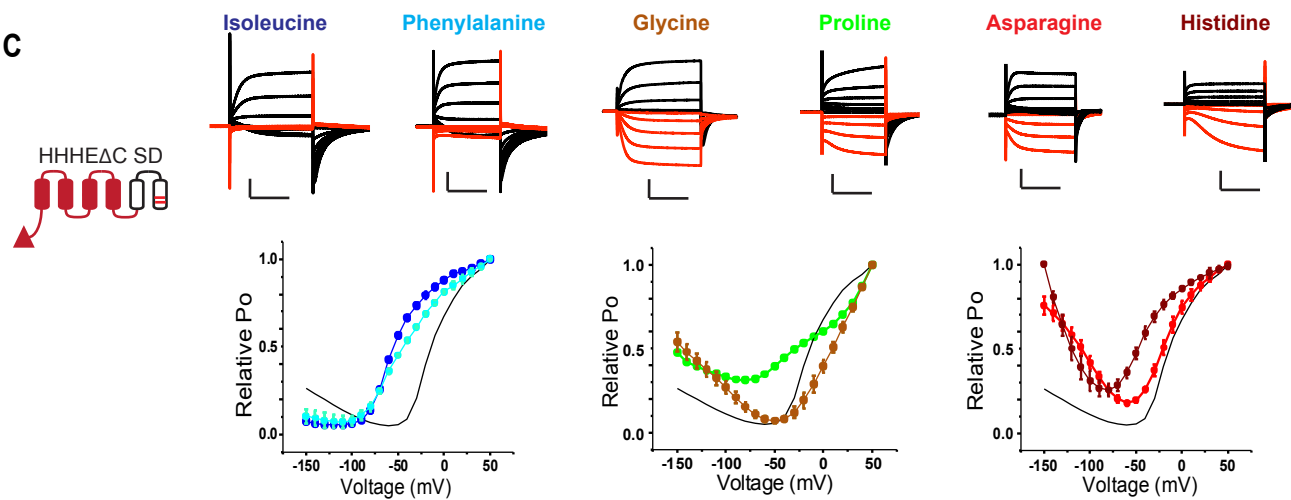

**D**

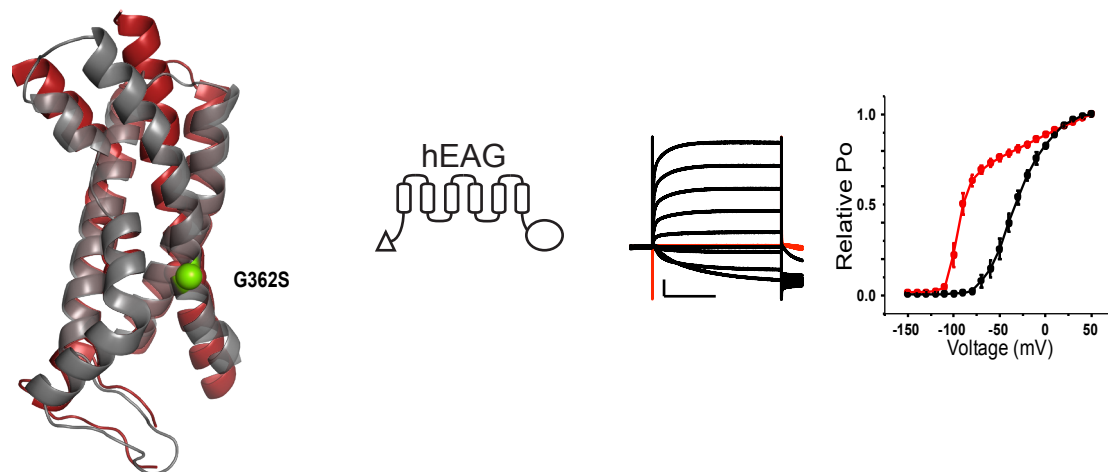

**Figure 5 - Figure Supplement 1**

Supplement: supp [file elife-53400-supp-v1.zip]

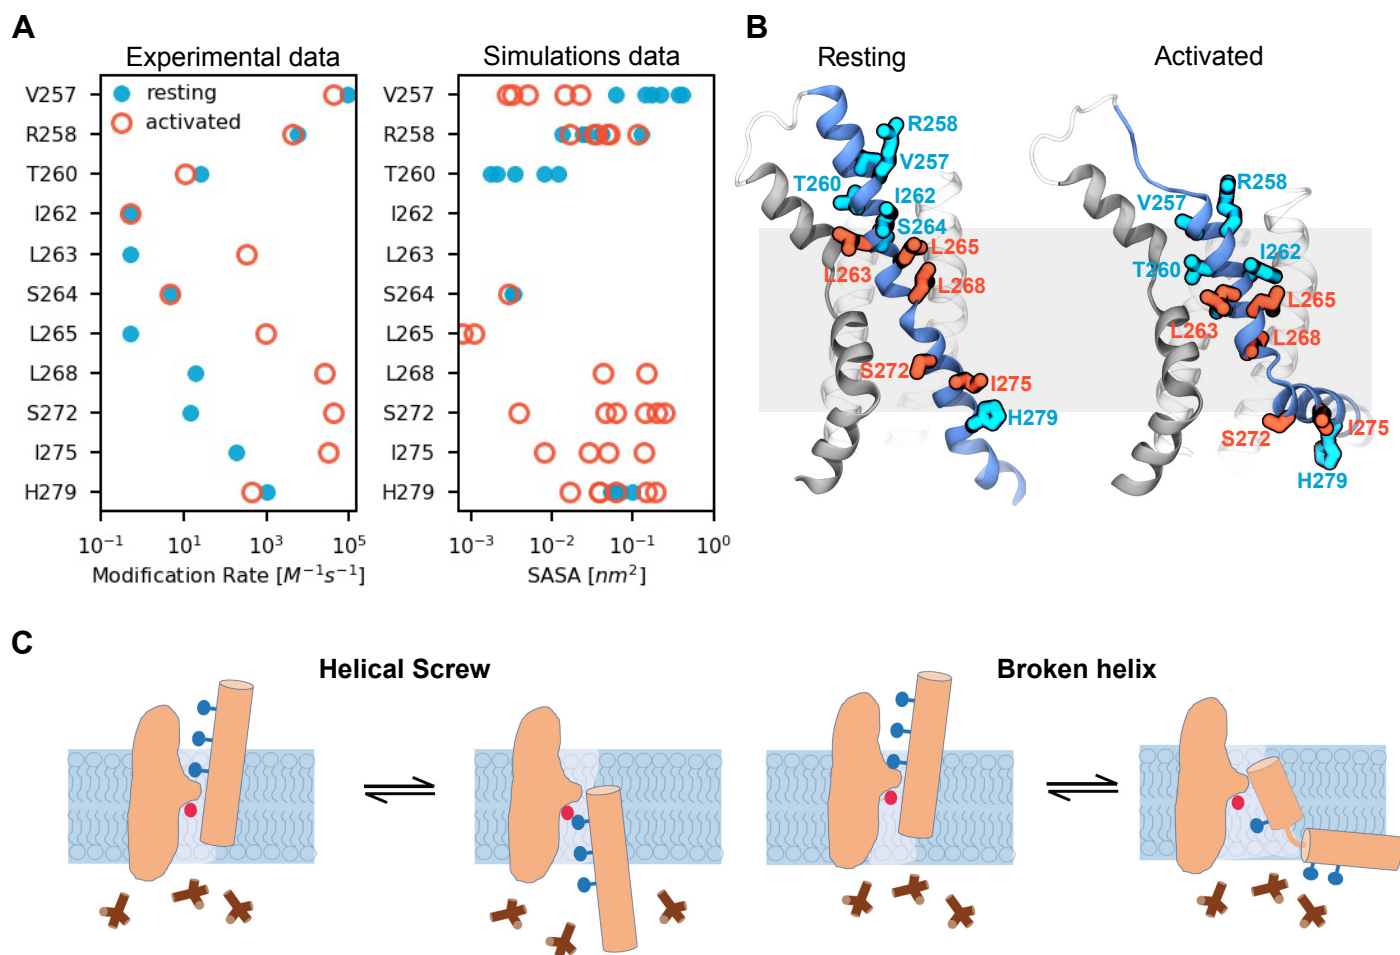

Figure 2- Figure Supplement 1

Supplement: supp [file elife-53400-supp-v1.zip]

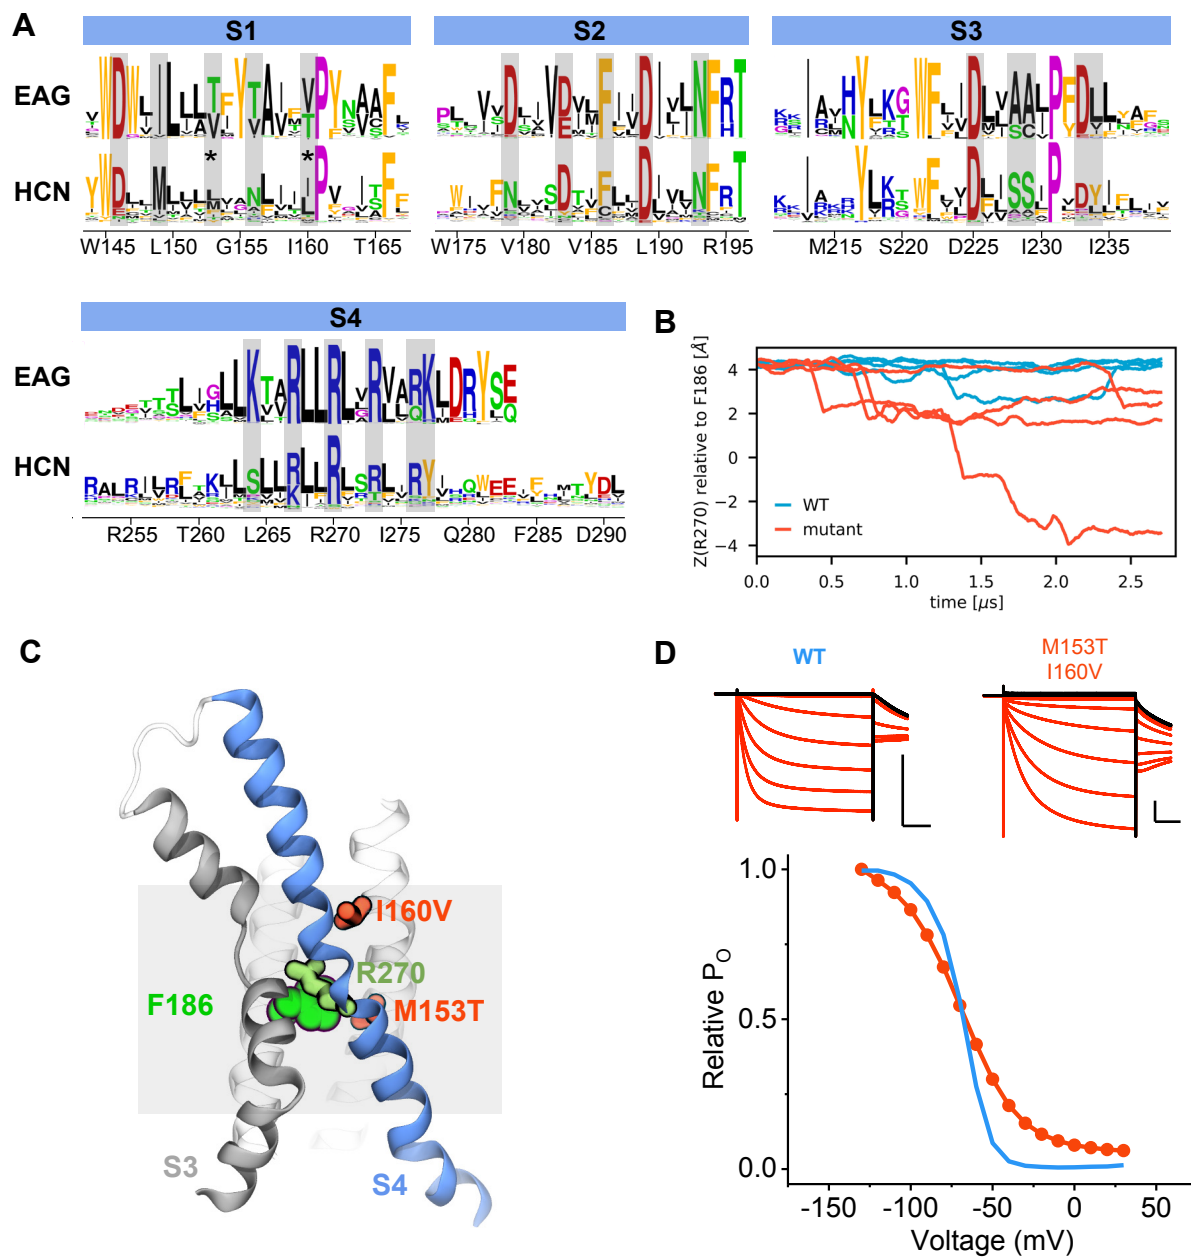

Figure 1 - Figure Supplement 1

Supplement: supp [file elife-53400-supp-v1.zip]
